# Supplementary material for: Commuting time to work and behaviour-related health: a fixed-effect analysis
Source: PubMed Central journal article supplement — Occup Environ Med. 2019 Dec 13;77(2):77–83. doi: 10.1136/oemed-2019-106173 (PMC7029233; doi:10.1136/oemed-2019-106173), 2019-12-13
Supplement: oemed-2019-106173supp001.pdf [file oemed-2019-106173supp001.pdf]

**Supplemental Material**

*Occupational and Environmental Medicine*

Commuting time to work and behaviour-related health: A fixed effect analysis

Halonen JI, Pulakka A, Vahtera J, Pentti J, Lagström H, Stenholm S, Magnusson Hanson LL

**Supplemental Table 1.** Odds ratios for physical inactivity and sleep problems by commuting time among those with normal working hours with additional adjustments.

| Commuting time<br>(N <sub>observations</sub> )* | Model 2 |        |       | Model 3 |        |       | Model 4 |        |       |
|-------------------------------------------------|---------|--------|-------|---------|--------|-------|---------|--------|-------|
|                                                 | OR      | 95% CI |       | OR      | 95% CI |       | OR      | 95% CI |       |
| <b>Overweight (vs. normal) (1469)</b>           |         |        |       |         |        |       |         |        |       |
| 1-5                                             | 1       |        |       | 1       |        |       | 1       |        |       |
| 6-10                                            | 1.01    | 0.71   | 1.45  | 1.03    | 0.72   | 1.46  | 1.03    | 0.72   | 1.47  |
| 11-15                                           | 0.99    | 0.45   | 2.17  | 0.99    | 0.45   | 2.18  | 0.98    | 0.44   | 2.16  |
| >15                                             | 1.20    | 0.36   | 3.94  | 1.24    | 0.38   | 4.07  | 1.26    | 0.38   | 4.12  |
| <b>Obesity (vs. overweight) (861)</b>           |         |        |       |         |        |       |         |        |       |
| 1-5                                             | 1       |        |       | 1       |        |       | 1       |        |       |
| >5                                              | 1.02    | 0.73   | 1.43  | 1.03    | 0.74   | 1.45  | 1.04    | 0.74   | 1.45  |
| <b>Physical inactivity (1720)</b>               |         |        |       |         |        |       |         |        |       |
| 1-5                                             | 1       |        |       | 1       |        |       | 1       |        |       |
| 6-10                                            | 1.10    | 0.80   | 1.52  | 1.13    | 0.82   | 1.56  | 1.14    | 0.83   | 1.58  |
| 11-15                                           | 0.99    | 0.50   | 1.98  | 0.99    | 0.49   | 1.98  | 0.97    | 0.48   | 1.94  |
| >15                                             | 1.30    | 0.41   | 4.14  | 1.35    | 0.42   | 4.34  | 1.35    | 0.42   | 4.36  |
| <b>Smoking (668)</b>                            |         |        |       |         |        |       |         |        |       |
| 1-5                                             | 1       |        |       | 1       |        |       | 1       |        |       |
| 6-10                                            | 1.04    | 0.60   | 1.80  | 1.04    | 0.60   | 1.80  | 1.00    | 0.57   | 1.76  |
| 11-15                                           | 0.59    | 0.17   | 2.04  | 0.59    | 0.17   | 2.07  | 0.61    | 0.17   | 2.18  |
| >15                                             | 1.30    | 0.11   | 15.44 | 1.27    | 0.10   | 15.36 | 1.25    | 0.10   | 15.25 |
| <b>Problem drinking (798)</b>                   |         |        |       |         |        |       |         |        |       |
| 1-5                                             | 1       |        |       | 1       |        |       | 1       |        |       |
| 6-10                                            | 0.91    | 0.57   | 1.48  | 0.97    | 0.59   | 1.57  | 0.97    | 0.59   | 1.59  |
| 11-15                                           | 0.40    | 0.16   | 1.04  | 0.40    | 0.15   | 1.03  | 0.40    | 0.15   | 1.06  |
| >15                                             | 0.41    | 0.09   | 1.86  | 0.38    | 0.08   | 1.71  | 0.38    | 0.08   | 1.73  |
| <b>Sleep problems (2811)</b>                    |         |        |       |         |        |       |         |        |       |
| 1-5                                             | 1       |        |       | 1       |        |       | 1       |        |       |
| 6-10                                            | 1.09    | 0.84   | 1.40  | 1.14    | 0.88   | 1.48  | 1.14    | 0.88   | 1.49  |
| 11-15                                           | 0.95    | 0.56   | 1.62  | 0.94    | 0.55   | 1.62  | 0.98    | 0.57   | 1.68  |
| >15                                             | 0.54    | 0.22   | 1.34  | 0.58    | 0.23   | 1.42  | 0.57    | 0.23   | 1.41  |
| 1-5                                             | 1       |        |       | 1       |        |       | 1       |        |       |
| >5                                              | 1.04    | 0.81   | 1.33  | 1.08    | 0.84   | 1.39  | 1.09    | 0.85   | 1.40  |

\* Number of observations informative in the analysis, i.e., those with change in the outcome.

Model 2 adjusted for age, cohabiting, presence of children, and occupational position

Model 3 adjusted for age, cohabiting, presence of children, occupational position, chronic disease, and depressive symptoms

Model 4 adjusted for age, cohabiting, presence of children, occupational position, chronic disease, depressive symptoms, job strain and shift work
